# Supplementary material
Source: PubMed Central journal article supplement (PMC6373742)
Supplement: ba024059-suppl1.pdf [file ba024059-suppl1.pdf]

## Supplementary Tables

**Table S1. Characteristics of patients with hairy cell leukemia.** b.c.m. : cm below costal margin on examination; \*at time of investigation; ^differential represented the percent of neutrophils, lymphocytes and hairy cells (HCs) of the white blood cells (WBC) as calculated by morphological examination of peripheral blood smear; Hb: haemoglobin; PLT: platelets; ~phenotype was determined on the peripheral blood mononucleated cell (PBMC) fraction in flow cytometry and percent of HCs was calculated as the CD103+ B-cell fraction of the lymphocyte gate; 2CdA: 2-Chloro-deoxyAdenosine; DCF: DeoxyCoFormicin; IFN: interferon-alpha.

| Characteristics                      | n/total (%) | Range (Median)   |
|--------------------------------------|-------------|------------------|
| <b><i>Clinical</i></b>               |             |                  |
| Age                                  |             | 33-75 (47)       |
| Male gender                          | 7/11 (64)   |                  |
| Splenomegaly                         | 7/11 (64)   |                  |
| Spleen b.c.m.                        |             | 0-16 (5)         |
| Second neoplasm*                     | 0/11 (0)    |                  |
| <b><i>FBCs and differential^</i></b> |             |                  |
| Hb (g/dl)                            |             | 8-17 (11.2)      |
| PLT (x109/L)                         |             | 28-114 (79.0)    |
| WBC (x109/L)                         |             | 4-41 (10.4)      |
| Neutrophils (%)                      |             | 3-38 (9.0)       |
| Lymphocytes (%)                      |             | 47-98 (86)       |
| HCs (%)                              |             | 10-93 (58)       |
| <b><i>Phenotype~</i></b>             |             |                  |
| HCs (%)                              |             | 33-73 (66.8)     |
| Kappa+                               | 4/11 (36)   |                  |
| CD20+                                | 11/11 (100) |                  |
| CD11c+                               | 11/11 (100) |                  |
| CD27+                                | 11/11 (100) |                  |
| CD38+                                | 11/11 (100) |                  |
| CD103+                               | 11/11 (100) |                  |
| <b><i>Bone Marrow histology</i></b>  |             |                  |
| HCs (%)                              |             | 50-95 (85)       |
| DBA44+                               | 11/11 (100) |                  |
| HCI                                  |             | 0.11-0.81 (0.44) |
| <b><i>Molecular</i></b>              |             |                  |
| IGHV homology                        |             | 91.7-99.0 (97.2) |
| IGHV $\leq$ 98% homology             | 10/11 (91)  |                  |
| BRAF V600E mutation                  | 11/11 (100) |                  |

---

## Supplementary Table legends

**Table S2. Biologic concepts obtained grouping over 6,100 gene sets belonging to the MSigDB v5.1 GSEA collection (1) into 100 main biological themes.**

**Table S3. HCL gene expression signature by Basso et al. (2).** Supervised comparison by moderated t-test (limma) and Fisher's exact test (methylation only) on the HCL methylation and gene expression profiles with the post-GC B-cell subsets (MGZ, loMBC and intMBC, grouped as one pool), and with SMZL and CLL (M-CLL, U-CLL and CLL-VH3-21). Fold changes corresponding to the M-value difference (methylation) or to the  $\log_2$  difference (gene expression) between HCL and post-GC B-cell averages, and between HCL and other B-cell tumor averages respectively.

**Table S4. Methylation profiles in HCL.** Supervised comparison by moderated t-test (limma) and Fisher's exact test of the HCL methylation profiles with the post-GC B-cell subsets (MGZ, loMBC and intMBC, grouped as one pool) and with SMZL and CLL (M-CLL, U-CLL and IGHV3-21+ CLL, called CLL-VH3-21, grouped as one pool). Fold changes corresponding to the M-value difference between HCL and other B-cell averages.

**Table S5. Methylation profiles in HCL and post-GC B-cells.** Supervised comparison by moderated t-test (limma) and Fisher's exact test of the HCL methylation profiles with the post-GC B-cell subsets (MGZ, loMBC and intMBC, grouped as one pool). Fold changes corresponding to the M-value difference between HCL and other B-cell averages.

**Table S6. Methylation profiles in HCL and other B-cell tumors.** Supervised comparison by moderated t-test (limma) and Fisher's exact test of the HCL methylation profiles with SMZL and CLL (M-CLL, U-CLL and IGHV3-21+ CLL, called CLL-VH3-21, grouped as one pool). Fold changes corresponding to the M-value difference between HCL and other B-cell averages.

**Table S7. Methylation profiles in HCL and SMZL.** Supervised comparison by moderated t-test (limma) and Fisher's exact test of the HCL methylation profiles with SMZL. Fold changes corresponding to the M-value difference between HCL and other B-cell averages.

**Table S8. Methylation profiles in HCL and M-CLL.** Supervised comparison by moderated t-test (limma) and Fisher's exact test of the HCL methylation profiles with M-CLL. Fold changes corresponding to the M-value difference between HCL and other B-cell averages.

**Table S9. Methylation profiles in HCL and U-CLL.** Supervised comparison by moderated t-test (limma) and Fisher's exact test of the HCL methylation profiles with U-CLL. Fold changes corresponding to the M-value difference between HCL and other B-cell averages.

**Table S10. Methylation profiles in HCL and IGHV3-21+ CLL.** Supervised comparison by moderated t-test (limma) and Fisher's exact test of the HCL methylation profiles with IGHV3-21+ CLL (CLL-VH3-21). Fold changes corresponding to the M-value difference between HCL and other B-cell averages.

**Table S11. Gene expression changes driven by methylation in HCL (I).** Supervised comparison by moderated t-test (limma) and Fisher's exact test (methylation only) on the HCL methylation and gene expression profiles with the post-GC B-cell subsets (MGZ, loMBC and intMBC, grouped as one pool). Fold changes corresponding to the M-value difference (methylation) or to the  $\log_2$  difference (gene expression) between HCL and post-GC B-cell averages.

**Table S12 Methylation and gene expression profiles in HCL of BCR, TLR-MAPK-NFKB, BRAF signaling genes; cell adhesion, B-cell differentiation markers and methylated transcripts in cancer.** Single sample GSEA (ssGSEA) (3) was performed on the methylation and gene expression profiling data. Differentially methylated and expressed signatures were selected by supervised comparison (moderated *t-test*) on the methylation and gene expression profiles of HCL and post-GC B-cell subsets (MGZ, loMBC and intMBC, grouped as one pool). Fold changes corresponding to the difference on the ssGSEA scores between HCL and post-GC B-cell averages.

**Table S13. Gene expression changes driven by methylation in HCL (II).** Supervised comparison by moderated t-test (limma) and Fisher's exact test (methylation only) of the HCL methylation and gene expression profiles and with SMZL and CLL (M-CLL, U-CLL and IGHV3-21+ CLL, called CLL-VH3-21). Fold changes corresponding to the M-value difference (methylation) or to the  $\log_2$  difference (gene expression) between HCL and other B-cell averages.

**Table S14. Enrichment analyses on Methylation and gene expression profiles in HCL.** Supervised comparison by moderated t-test (limma) of the HCL methylation and gene expression concepts with the post-GC B-cell subsets (MGZ, loMBC and intMBC, grouped as one pool), and with SMZL and the CLL pool (M-CLL, U-CLL and IGHV3-21+ CLL, called CLL-VH3-21, grouped as one pool). Fold changes corresponding to the difference in single-sample GSEA (ssGSEA) score (methylation or gene expression) between HCL and post-GC B-cell, and between HCL and other B-cell tumors (SMZL and the CLL pool), respectively.

## Supplementary Figures

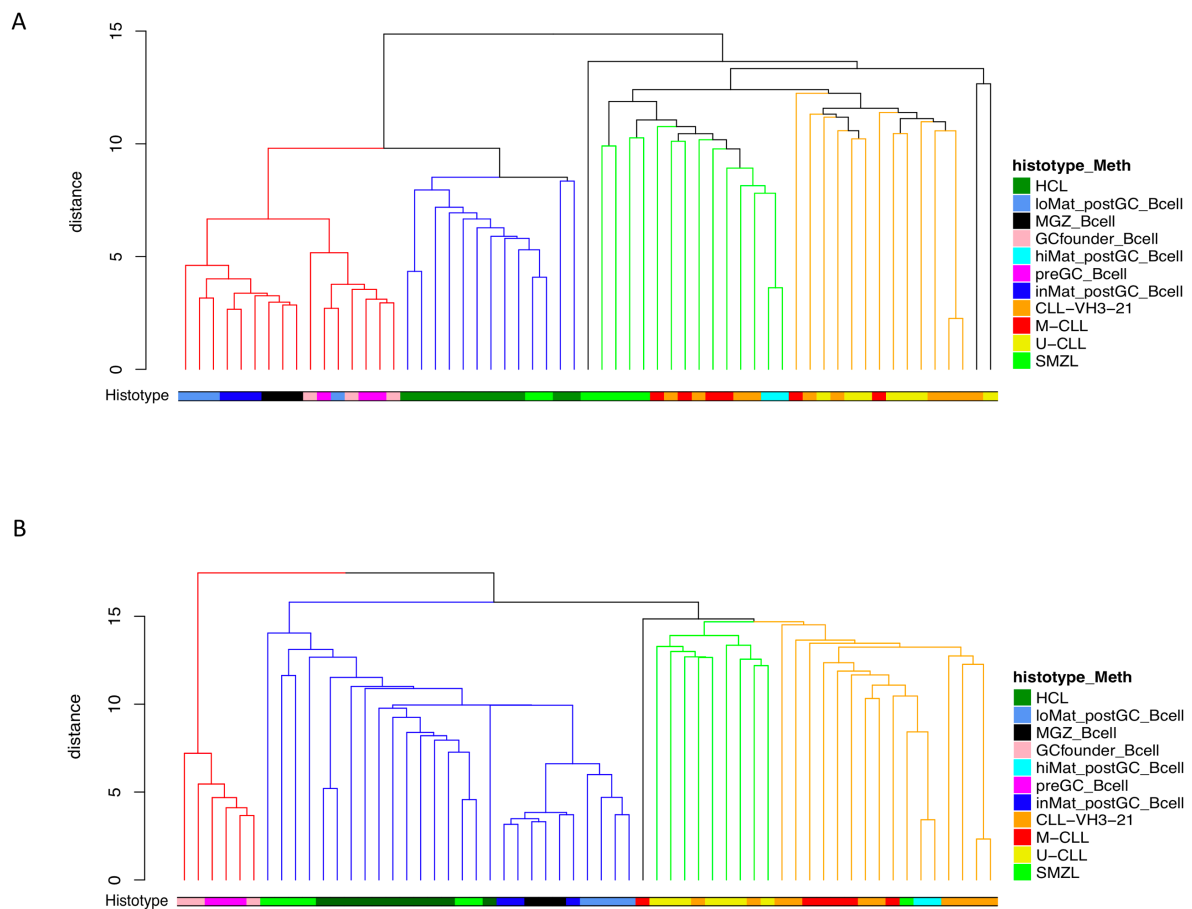

**Figure S1. (A) Unsupervised hierarchical clustering (Euclidean distance, complete linkage) using CGI-probes; (B) Unsupervised hierarchical clustering using non CGI-probes (Euclidean distance, complete linkage).** Methylation profiling (histotype\_Meth in the legend) included hairy cell leukemia (HCL, dark green); chronic lymphocytic leukemia samples included un-mutated (U-CLL, yellow), mutated (M-CLL, red) IGHV, and IGHV3-21+ (CLL-VH3-21, orange); splenic marginal zone lymphoma (SMZL, light green); naive B cells (preGC\_Bcell, magenta); germinal center (GC) founder B-cells (B-cells upon antigen encountering, GCfounder\_Bcell, light pink); low-, intermediate- and high-maturity memory B cells (loMat\_postGC\_Bcell in light blue; inMat\_postGC\_Bcell in blue; and hiMat\_postGC\_Bcell in cyan, respectively); and splenic marginal zone B-cells (MGZ\_Bcell in black).

A

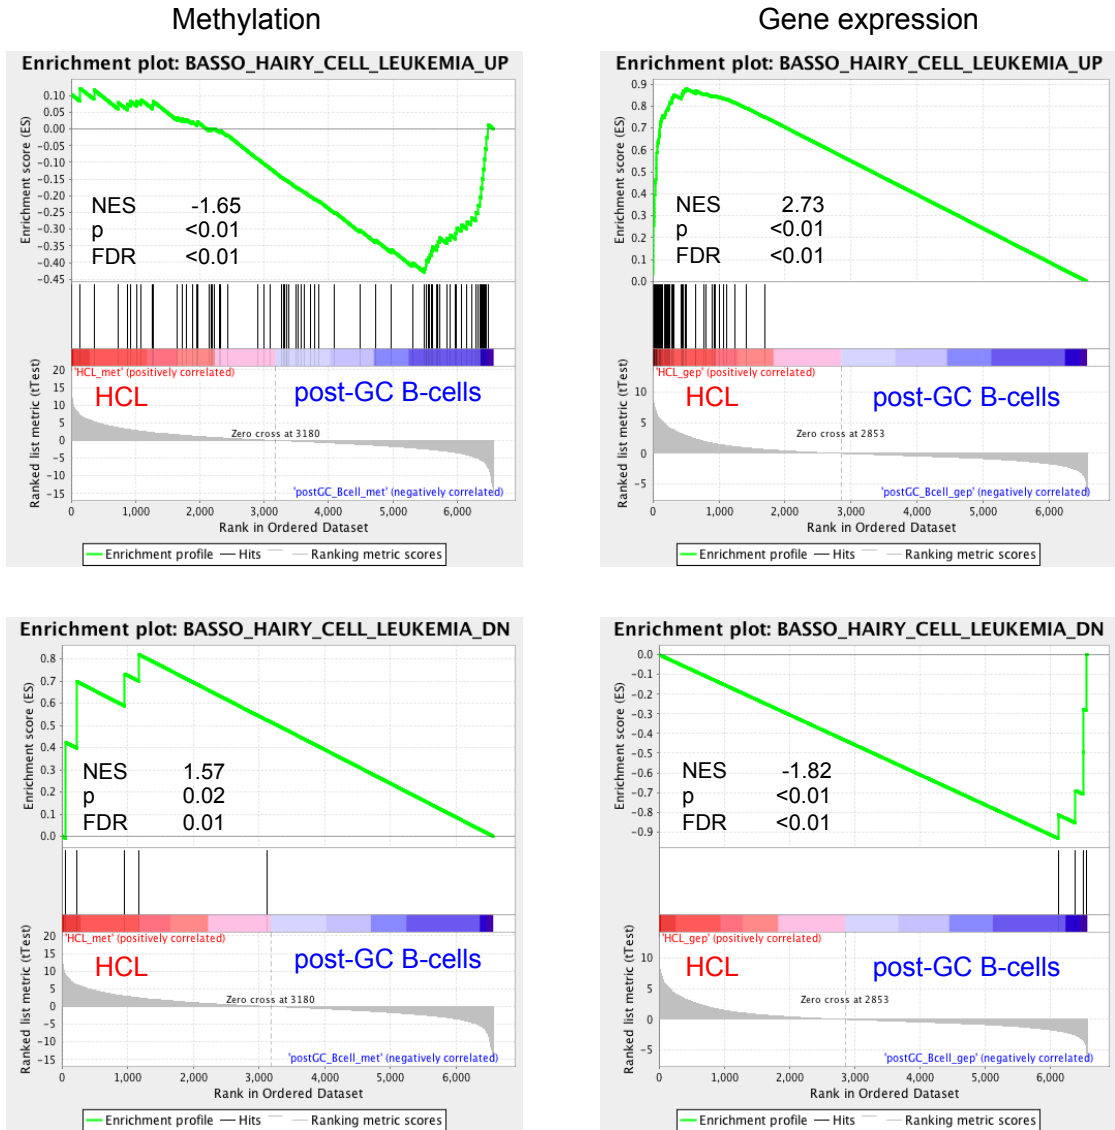

**Figure S2A. Methylation importantly contributes to the HCL gene expression signature (I).** Gene expression signatures of HCL (described by *Basso et al* (2)) were analyzed by gene set enrichment analyses (GSEA) (1) of the methylation (left panel) and gene expression (right panel) profiles of HCL (red) and post-GC B-cells (blue). NES: normalized enrichment score, p: nominal p-value, FDR: false discovery rate.

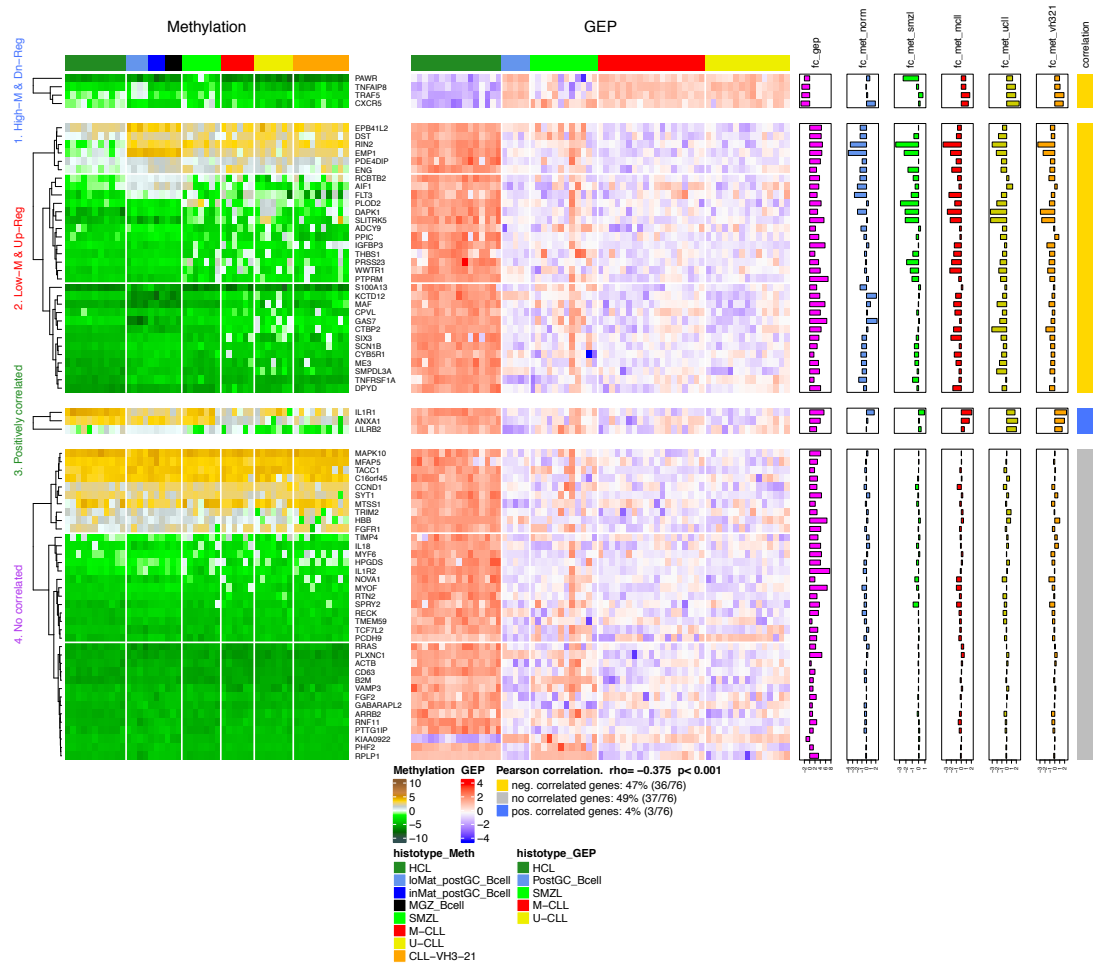

**Figure S2B. Methylation importantly contributes to the HCL gene expression signature (II).** Integration of promoter methylation data (heatmap on right) with the published gene expression profile (GEP, heatmap on left) (2). 36 out of 76 differentially transcribed genes (47%) inversely correlated with the methylation status. Hierarchical clustering (on rows, Euclidean distance, complete linkage) based on the methylation profile. Pearson's correlation was performed between methylation and GEP ( $\rho = -0.375$ ,  $p < 0.001$ ), *fc\_gep* means fold change in gene expression; *fc\_met\_norm*, *fc\_met\_smzl*, *fc\_met\_mcll*, *fc\_met\_ucl* and *fc\_met\_vh321* means differences in M-values in HCL compared to post-GC B-cells, SMZL, M-CLL, U-CLL or CLL-VH3-21 respectively. Methylation profiling (histotype\_Meth in the legend) included hairy cell leukemia (HCL, dark green); chronic lymphocytic leukemia samples included un-mutated (U-CLL, yellow), mutated (M-CLL, red) IGHV, and IGHV3-21+ (CLL-VH3-21, orange); splenic marginal zone lymphoma (SMZL, light green); low- and intermediate-maturity memory B cells (loMat\_postGC\_Bcell in light blue and inMat\_postGC\_Bcell in blue, respectively), and splenic marginal zone B-cells (MGZ\_Bcell in black). Gene expression profiling (histotype\_GEP in the legend) included hairy cell leukemia (HCL, dark green); chronic lymphocytic leukemia samples included un-mutated (U-CLL, yellow), mutated (M-CLL, red) IGHV; splenic marginal zone lymphoma (SMZL, light green); and memory B cells (postGC\_Bcell, light blue).



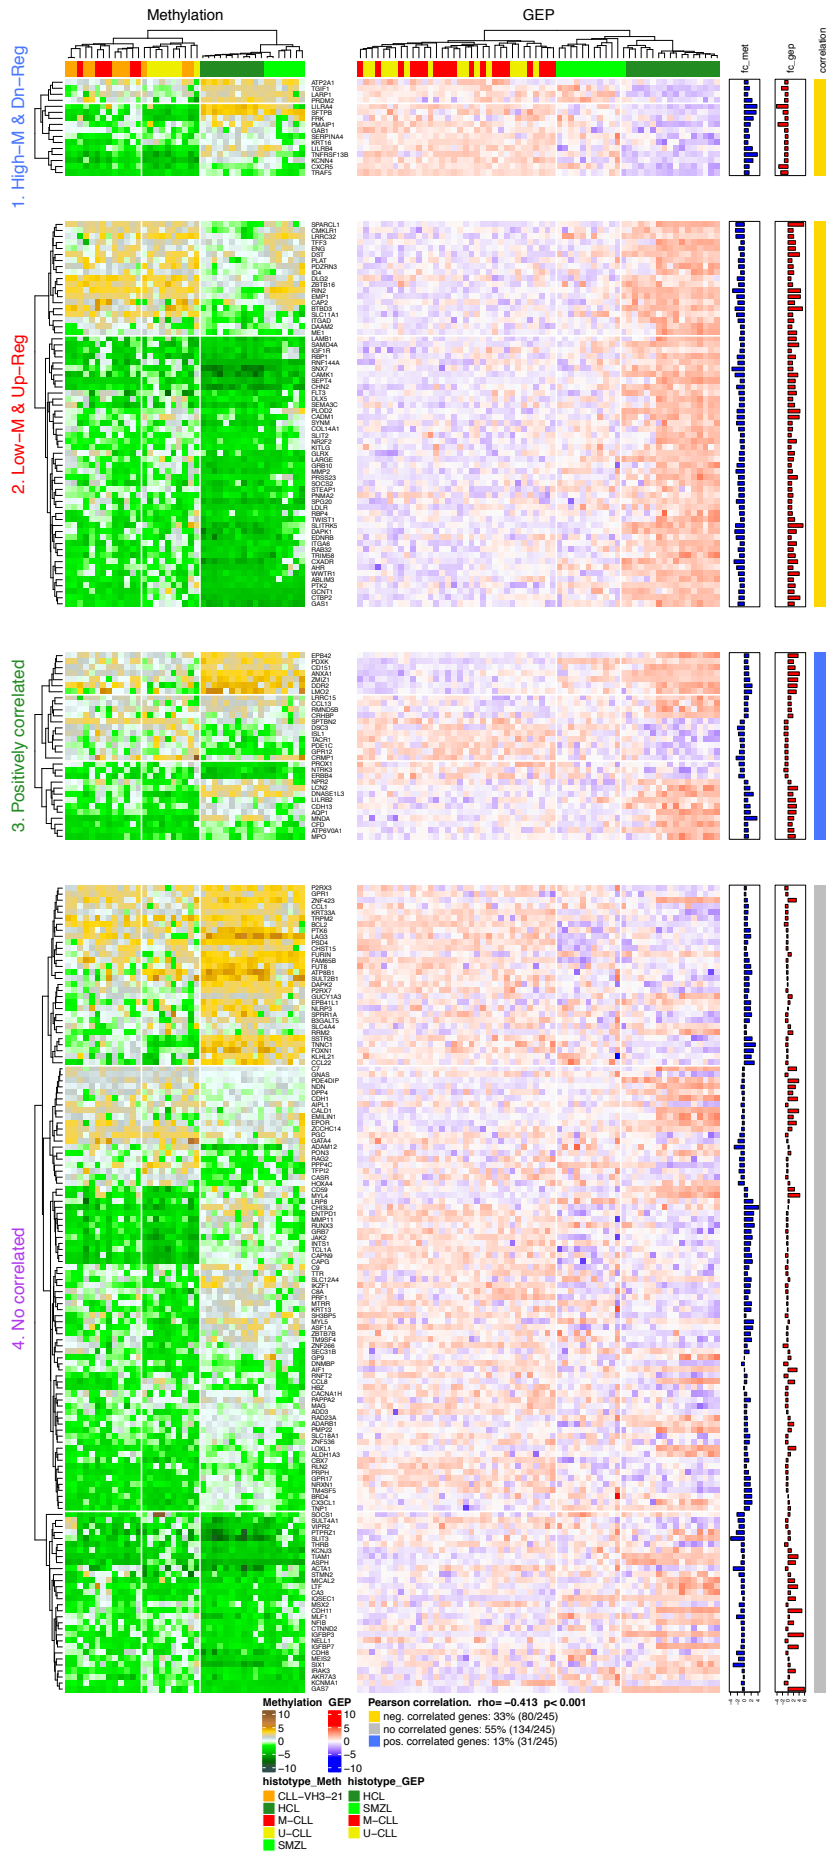



**Figure S4. Integration of methylation (heatmap on left) and gene expression (heatmap on right) profiles of HCL, SMZL and the CLL pool (M-CLL, U-CLL and CLL-VH3-21).** Supervised hierarchical clustering (Euclidean distance, complete linkage) of methylation profiles. Pearson's correlation was performed between methylation and GEP ( $\rho = -0.413$ ,  $p < 0.001$ ), *fc\_met* means fold change in methylation; *fc\_gep* means fold change in gene expression. Methylation profiling (histotype\_Meth in the legend) included hairy cell leukemia (HCL, dark green); chronic lymphocytic leukemia samples included un-mutated (U-CLL, yellow), mutated (M-CLL, red) IGHV, and IGHV3-21+ (CLL-VH3-21, orange); and splenic marginal zone lymphoma (SMZL, light green). Gene expression profiling (histotype\_GEP in the legend) included hairy cell leukemia (HCL, dark green); chronic lymphocytic leukemia samples included un-mutated (U-CLL, yellow), mutated (M-CLL, red) IGHV; and splenic marginal zone lymphoma (SMZL, light green).

## References

1. Subramanian A, Tamayo P, Mootha VK, Mukherjee S, Ebert BL, Gillette MA, et al. Gene set enrichment analysis: a knowledge-based approach for interpreting genome-wide expression profiles. *Proceedings of the National Academy of Sciences of the United States of America*. 2005 Oct 25;102(43):15545-50.
2. Basso K, Liso A, Tiacci E, Benedetti R, Pulsoni A, Foa R, et al. Gene expression profiling of hairy cell leukemia reveals a phenotype related to memory B cells with altered expression of chemokine and adhesion receptors. *J Exp Med*. 2004 Jan 5;199(1):59-68.
3. Hanzelmann S, Castelo R, Guinney J. GSEA: gene set variation analysis for microarray and RNA-seq data. *BMC Bioinformatics*. 2013 Jan 16;14:7.
